# Supplementary material for: Interventions for preventing or treating malnutrition in problem drinkers who are homeless or vulnerably housed: protocol for a systematic review
Source: Springer Nature journal article supplement (doi:10.1186/s13643-015-0114-3), 2015-09-29
Supplement: MOESM1 [file 9787558]

## Additional file 1: Search strategy- Medline (Ovid)

- 1 exp Homeless Persons/ (6848)
- 2 homeless\$.ti,ab. (6708)
- 3 (rough adj2 (sleep\$ or living)).ti,ab. (33)
- 4 ((street or streets) adj4 (drinker\$ or sleeper\$ or living)).ti,ab. (196)
- 5 ((vulnerabl\$ or temporar\$ or marginally) adj3 (accommodated or accommodation or housed or housing)).ti,ab. (251)
- 6 (hostel\$ or flophous\$ or flop-hous\$ or dossous\$ or doss-hous\$ or skid-row or "bed and breakfast" or sofa surf\$ or nightshelter\$).ti,ab. (787)
- 7 (evict\$ adj4 (home\$ or hous\$ or accommodat\$)).ti,ab. (25)
- 8 social marginalization/ (130)
- 9 (social\$ adj3 (marginali\$ or exclude\$ or exclusion)).ti,ab. (1427)
- 10 or/1-9 (11003)
- 11 \*Substance-related disorders/co, dh, pa, pp, pc, rh, th (23198)
- 12 Alcoholics/ (159)
- 13 Alcohol-Related Disorders/co, pa, pp, pc, rh, th (1550)
- 14 Alcohol-Induced Disorders/co, dh, pa, pp, pc, rh, th (105)
- 15 drinking behavior/ and alcohol\$.mp. (684)
- 16 exp Alcohol Drinking/co, pa, pp, pc, th (6083)
- 17 (wernicke encephalopathy/ or korsakoff syndrome/) and alcohol\$.mp. (810)
- 18 Alcoholic Intoxication/co, dh, pa, pp, pc, rh, th (4179)
- 19 Alcoholism/co, dh, pa, pp, pc, rh, th (38520)
- 20 \*Alcohol-Related Disorders/ or \*Alcohol-Induced Disorders/ or \*Alcoholic Intoxication/ or \*Alcoholism/ (60148)
- 21 (alcohol adj2 (abus\$ or misus\$ or problem or problems or problematic or addict\$ or dependen\$)).ti,ab. (29784)
- 22 (alcoholic adj2 (patient\$ or intoxication)).ti,ab. (7428)
- 23 ((heavy or binge or problem or problems or problematic or excessiv\$ or dependen\$) adj2 (drinker\$ or drinking)).ti,ab. (12369)
- 24 (alcoholics or drunkard\$).ti,ab. (13520)
- 25 alcoholism.ti. (11688)
- 26 ((wernicke\$ or korsakoff) adj12 alcohol\$).ti,ab. (515)
- 27 or/11-26 (118371)
- 28 10 or 27 (128233)
- 29 exp Deficiency Diseases/dh, pc, rh, th (10267)
- 30 Malnutrition/dh, pc, rh, th (2610)
- 31 starvation/dh, pc, rh, th (301)
- 32 \*diet/ or energy intake/ (79646)
- 33 Food Assistance/ or food habits/ or food storage/ or cooking/ (31777)
- 34 food/ or bread/ or cereals/ or exp dairy products/ or dietary carbohydrates/ or dietary proteins/ or eggs/ or exp food, preserved/ or fruit/ or exp meat/ or nuts/ or raw foods/ or seeds/ or vegetables/ or vegetable proteins/ or exp dietary supplements/ or foods, specialized/ or exp food, fortified/ or cacao/ or exp meals/ (323340)
- 35 exp Micronutrients/ad, ut, tu, th (109906)
- 36 hunger/ or appetite/ or nutritive value/ (18769)
- 37 feeding behavior/ or food preferences/ (49834)
- 38 Nutritional Requirements/ (17575)
- 39 food services/ or menu planning/ or food supply/ or food quality/ (14757)
- 40 Nutrition Disorders/dh, pc, rh, th (4293)
- 41 nutrition assessment/ or exp nutrition surveys/ (26077)
- 42 ((malnourish\$ or malnutrition) adj3 (prevent\$ or alleviat\$ or treat\$)).ti,ab. (1399)

43 ((nutrition\$ or malnutrition) adj3 (assess\$ or profil\$)).ti,ab. (7675)  
44 ((nutrition\$ or nutritive) adj2 value).ti,ab. (4132)  
45 ((nutrition\$ or nutrient\$) adj3 (intake or adequate or adequacy or inadequate or inadequac\$ or deficient or deficienc\$ or quality or composition or improvement\$ or supplement\$ or assessment\$ or risk or status or state or healthy or evaluation\$)).ti,ab. (58331)  
46 ((menu\$ or meal\$ or diet\$) adj3 (information or education or advice)).ti,ab. (5176)  
47 ((menu\$ or meal\$) adj3 (charit\$ or low-cost or cheap\$ or balanced or nutritious or quality or provide\$ or provision or composition or planning or healthy or improvement\$ or preference\$)).ti,ab. (2617)  
48 (diet\$ adj3 (healthy or balanced or nutritious or improvement\$ or inadequate or adequate or adequacy or deficient or deficienc\$ or inadequac\$ or supplement\$ or better or preference\$)).ti,ab. (48165)  
49 ((food or foods or foodstuffs) adj3 (cooked or storage or tinned or canned or functional or parcel\$ or pack or packs or assistance or choice\$ or provide\$ or provision or adequate or adequacy or inadequate or inadequac\$ or aid or program\$ or charit\$ or supplement\$ or high energy or fortified or healthy or cost or quality)).ti,ab. (23031)  
50 (eating adj2 (well or healthily or cheaply or advice or better or regular\$ or healthy)).ti,ab. (3614)  
51 (multimicronutrient\$ or multi-micronutrient\$ or micronutrient\$ or micro-nutrient\$ or multinutrient\$ or multi-nutrient\$).ti,ab. (8760)  
52 ((vitamin\$ or multivitamin\$ or mineral\$ or benfotiamine) adj3 (pill\$ or tablet\$ or supplement\$)).ti,ab. (17220)  
53 ((chocolate or cereal or energy) adj2 (snack\$ or "bar" or "bars")).ti,ab. (368)  
54 (snack\$ adj3 (system\$ or healthy or fortif\$)).ti,ab. (163)  
55 (soup kitchen\$ or free meal\$ or cooking or eatwell or eat-well or meal service\$ or regular meal\$).ti,ab. (8556)  
56 (thiamin\$ adj2 (supplement\$ or parenteral or injection\$ or pill\$ or tablet\$ or repletion)).ti,ab. (409)  
57 ((caloric or calorie\$ or carbohydrate\$ or protein or energy) adj2 intake).ti,ab. (29335)  
58 (dietary adj2 (protein\$ or carbohydrate\$ or supplement\$)).ti,ab. (23204)  
59 ((consum\$ or eat\$) adj2 (fruit\$ or vegetable\$ or cereal\$ or chocolate\$ or egg\$ or bread or yoghurt or nut or nuts or dairy product\$)).ti,ab. (8899)  
60 or/29-59 (652567)  
61 28 and 60 (3889)  
62 letter/ (912491)  
63 editorial/ (368819)  
64 news/ (165754)  
65 exp historical article/ (340653)  
66 Anecdotes as topic/ (4692)  
67 comment/ (614119)  
68 case report/ (1760670)  
69 (letter or comment\$).ti. (98002)  
70 animals/ not humans/ (3986044)  
71 exp Animals, Laboratory/ (755008)  
72 exp Animal Experimentation/ (6770)  
73 exp Models, Animal/ (445300)  
74 exp rodentia/ (2773028)  
75 (rat or rats or rodent\$ or cat or cats or pig or pigs or dog or dogs or sheep or cow or cows or ovine or porcine or canine or feline or primate\$ or monkey\$ or mouse or mice).ti. (1549185)  
76 or/62-75 (8138094)  
77 exp child/ or exp newborn/ or (p?ediatric or f?etal or f?etus or pre-natal or prenatal or child\$ or infant\$ or neonat\$ or newborn\$ or baby or babies).ti. (2240520)  
78 exp adult/ or adult\$.ti. (5934108)  
79 77 not 78 (1522181)  
80 76 or 79 (9231431)  
81 61 not 80 (2518)
