# Supplementary material for: Interventions for preventing or treating malnutrition in problem drinkers who are homeless or vulnerably housed: protocol for a systematic review
Source: Springer Nature journal article supplement (doi:10.1186/s13643-015-0114-3), 2015-09-29
Supplement: MOESM2 [file 9787558]

Additional file 2: Draft Study Selection Form

**Citation Details**

Assessor name..... Date .....

**Report ID** ..... First author .....

Journal ..... Publication year .....

Study/Trial name (e.g “UK 2001-2003”) .....

**Study Selection Criteria**

1. POPULATION: Does this paper contain a majority of homeless or vulnerably housed participants (or consider them as a subgroup). [Note: exclude those who are homeless for reasons of mass displacement or where entire populations are homeless (see definition).] yes / no

1a. Does this paper suggest that it contains at least half alcohol dependent participants (or mixed alcohol and drug dependents)? [Note: include studies which report results separately for them (see definition).] yes / no / unclear [Don't exclude papers based on this Q]

2. INTERVENTION: Does this paper contain any nutritional-based intervention, targeted at improving nutrition, or correcting or preventing malnutrition, in any arm? [Note: Include micro- and macro-supplementation in oral or parenteral formats.] yes / no

3. STUDY DESIGN: Is the study design one of the eligible designs (RCTs; Cluster RCTs; non-randomised, controlled study; controlled before and after study; interrupted time-series)? yes / no

3a. What is the study design?  
RCT; Cluster RCT; non-randomised, controlled study; controlled before and after study; interrupted time-series, uncontrolled before and after study, cohort study, systematic review, anecdotal evidence, case study or other (*specify*).....

**Status of Study**

Excluded / Included / Pending

If excluded, main reason for exclusion (put 1, 2 or 3, for the 1<sup>st</sup> question answered No to): .....
